# Supplementary material
Source: publisher site journal article supplement (https://www.dovepress.com/article/469677)
Supplement: Supplementary file 1 [file get_supplementary_file.php]

**Supplemental table1. Participant Characteristics for training cohort and validation cohort**

| **Overall（n=733）** | | | | | | |
| --- | --- | --- | --- | --- | --- | --- |
|  | **train（n=513）** | | **validation（n=220）** | | **P** | **SMD** |
| MAFLD(%) | No | 148 ( 28.8) | No | 59 ( 26.8) | 0.592 | 0.045 |
| Yes | 365 ( 71.2) | Yes | 161 ( 73.2) |
| CAP(median，[IQR]) | 293.00 [250.00, 329.00] | | 287.00 [243.75, 321.00] | | 0.226 | 0.089 |
| E(median，[IQR]) | 5.50 [4.50, 7.00] | | 5.50 [4.50, 6.60] | | 0.565 | 0.047 |
| Age(median，[IQR]) | 39.00 [32.00, 50.00] | | 40.00 [32.00, 52.00] | | 0.261 | 0.087 |
| Height(median，[IQR]) | 163.50 [159.00, 170.50] | | 164.50 [159.00, 170.62] | | 0.527 | 0.047 |
| Weight(median，[IQR]) | 75.70 [66.00, 87.50] | | 75.70 [65.88, 85.50] | | 0.673 | 0.029 |
| Gender(%) | Female | 301 ( 58.7) | Female | 125 ( 56.8) | 0.7 | 0.038 |
| Male | 212 ( 41.3) | Male | 95 ( 43.2) |
| Hypertension(%) | No | 401 ( 78.2) | No | 180 ( 81.8) | 0.309 | 0.091 |
| Yes | 112 ( 21.8) | Yes | 40 ( 18.2) |
| Prediabetes(%) | No | 392 ( 76.4) | No | 178 ( 80.9) | 0.213 | 0.11 |
| Yes | 121 ( 23.6) | Yes | 42 ( 19.1) |
| T2DM(%) | No | 291 ( 56.7) | No | 112 ( 50.9) | 0.171 | 0.117 |
| Yes | 222 ( 43.3) | Yes | 108 ( 49.1) |
| Hashimoto's thyroiditis(%) | No | 459 ( 89.5) | No | 202 ( 91.8) | 0.4 | 0.081 |
| Yes | 54 ( 10.5) | Yes | 18 ( 8.2) |
| Hypothyroidism(%) | No | 480 ( 93.6) | No | 214 ( 97.3) | 0.062 | 0.178 |
| Yes | 33 ( 6.4) | Yes | 6 ( 2.7) |
| Hhyroid nodules(%) | No | 425 ( 82.8) | No | 187 ( 85.0) | 0.541 | 0.059 |
| Yes | 88 ( 17.2) | Yes | 33 ( 15.0) |
| Graves disease(%) | No | 503 ( 98.1) | No | 214 ( 97.3) | 0.7 | 0.051 |
| Yes | 10 ( 1.9) | Yes | 6 ( 2.7) |
| helicobacter pylori infection(%) | No | 491 ( 95.7) | No | 207 ( 94.1) | 0.451 | 0.074 |
| Yes | 22 ( 4.3) | Yes | 13 ( 5.9) |
| Overweight(%) | No | 91 ( 17.7) | No | 35 ( 15.9) | 0.621 | 0.049 |
| Yes | 422 ( 82.3) | Yes | 185 ( 84.1) |
| Obesity(%) | No | 253 ( 49.3) | No | 119 ( 54.1) | 0.27 | 0.096 |
| Yes | 260 ( 50.7) | Yes | 101 ( 45.9) |
| Metabolic risk factors(%) | No | 127 ( 24.8) | No | 60 ( 27.3) | 0.533 | 0.057 |
| Yes | 386 ( 75.2) | Yes | 160 ( 72.7) |
| BMI(median，[IQR]) | 28.10 [25.00, 31.40] | | 27.50 [24.90, 30.80] | | 0.29 | 0.064 |
| CRP(median，[IQR]) | 0.60 [0.50, 1.45] | | 0.52 [0.50, 1.26] | | 0.286 | 0.006 |
| WBC(median，(SD)) | 6.75 (1.76) | | 6.57 (1.82) | | 0.204 | 0.102 |
| RBC(median，(SD)) | 4.90 (0.55) | | 4.90 (0.50) | | 0.836 | 0.017 |
| hB(median，[IQR]) | 142.00 [132.00, 154.00] | | 142.00 [133.00, 153.25] | | 0.854 | 0.029 |
| Plt(median，[IQR]) | 241.00 [201.00, 296.00] | | 234.00 [200.00, 270.00] | | 0.029 | 0.233 |
| AST(median，[IQR]) | 20.00 [16.00, 28.00] | | 20.00 [17.00, 26.25] | | 0.709 | 0.072 |
| ALT(median，[IQR]) | 25.00 [17.00, 41.00] | | 23.00 [16.00, 41.25] | | 0.298 | 0.053 |
| ALP(median，[IQR]) | 77.00 [63.00, 94.00] | | 76.00 [64.00, 91.00] | | 0.944 | 0.005 |
| GGT(median，[IQR]) | 34.10 [22.00, 53.90] | | 32.50 [19.80, 58.57] | | 0.562 | 0.109 |
| Abo(median，(SD) | 46.73 (4.87) | | 46.97 (4.85) | | 0.549 | 0.048 |
| A/G(median，[IQR]) | 1.99 (0.30) | | 2.02 (0.35) | | 0.308 | 0.08 |
| TBil(median，(SD) | 11.59 (5.97) | | 11.82 (5.54) | | 0.619 | 0.041 |
| Creatinine(median，(SD)) | 63.64 (14.46) | | 63.59 (13.78) | | 0.967 | 0.003 |
| BUN(median，(SD) | 5.18 (1.35) | | 5.14 (1.37) | | 0.728 | 0.028 |
| Cystatinc(median，(SD) | 0.91 (0.18) | | 0.89 (0.17) | | 0.241 | 0.096 |
| FBG(median，[IQR]) | 5.60 [5.09, 6.81] | | 5.65 [5.08, 6.78] | | 0.912 | 0.073 |
| UA(median，[IQR]) | 378.40 [315.00, 454.30] | | 378.70 [292.90, 442.40] | | 0.197 | 0.118 |
| TC(median，[IQR]) | 4.95 [4.31, 5.66] | | 4.90 [4.28, 5.38] | | 0.323 | 0.095 |
| TG(median，[IQR]) | 1.63 [1.10, 2.35] | | 1.61 [1.08, 2.34] | | 0.896 | 0.002 |
| HDL(median，[IQR]) | 1.31 [1.13, 1.50] | | 1.36 [1.16, 1.52] | | 0.135 | 0.135 |
| LDL(median，(SD) | 2.99 (0.76) | | 2.88 (0.81) | | 0.082 | 0.139 |
| HbA1c(median，[IQR]) | 6.10 [5.70, 7.00] | | 6.05 [5.70, 7.00] | | 0.829 | 0.002 |
| INS(median，[IQR]) | 9.33 [5.92, 15.01] | | 8.36 [5.96, 13.91] | | 0.231 | 0.103 |
| C-Peptide(median，[IQR]) | 2.30 [1.66, 3.02] | | 2.22 [1.61, 2.91] | | 0.458 | 0.04 |
| TBW(median，[IQR]) | 35.20 [30.90, 42.00] | | 35.10 [31.20, 41.32] | | 0.925 | 0.005 |
| ICW(median，[IQR]) | 21.70 [19.10, 26.00] | | 21.70 [19.17, 25.42] | | 0.971 | 0.009 |
| ECW(median，[IQR]) | 13.40 [11.80, 16.00] | | 13.40 [11.88, 15.80] | | 0.839 | 0.003 |
| Protein(median，[IQR]) | 9.30 [8.30, 11.20] | | 9.40 [8.30, 11.00] | | 0.937 | 0.007 |
| Minerals(median，[IQR]) | 3.23 [2.88, 3.80] | | 3.27 [2.90, 3.77] | | 0.738 | 0.007 |
| BFM(median，[IQR]) | 26.60 [20.90, 33.20] | | 26.40 [20.38, 32.30] | | 0.543 | 0.044 |
| SLM(median，[IQR]) | 45.00 [39.70, 53.90] | | 45.00 [40.05, 53.00] | | 0.921 | 0.005 |
| FFM(median，[IQR]) | 47.80 [42.00, 57.00] | | 47.80 [42.42, 56.20] | | 0.91 | 0.004 |
| SMM(median，[IQR]) | 26.40 [22.90, 31.90] | | 26.30 [22.98, 31.15] | | 0.971 | 0.009 |
| PBF(median，[IQR]) | 35.80 [29.80, 40.40] | | 35.85 [30.00, 39.62] | | 0.707 | 0.034 |
| BMR(median，[IQR]) | 1403.00 [1276.00, 1602.00] | | 1402.50 [1287.25, 1584.25] | | 0.915 | 0.005 |
| WHR(median，[IQR]) | 0.93 [0.90, 0.98] | | 0.92 [0.89, 0.97] | | 0.201 | 0.077 |
| VFA(median，[IQR]) | 128.50 [97.10, 164.50] | | 128.10 [95.78, 157.90] | | 0.787 | 0.027 |
| BCM(median，[IQR]) | 31.10 [27.30, 37.20] | | 31.10 [27.45, 36.45] | | 0.97 | 0.009 |
| AC(median，[IQR]) | 33.40 [31.00, 36.00] | | 32.75 [31.00, 35.62] | | 0.273 | 0.06 |
| AMC(median，[IQR]) | 28.20 [26.30, 30.10] | | 27.80 [26.28, 29.83] | | 0.421 | 0.051 |
| BMC(median，[IQR]) | 2.66 [2.36, 3.14] | | 2.68 [2.38, 3.07] | | 0.825 | 0.003 |
| TBW/FFM(median，[IQR]) | 73.60 [73.40, 73.70] | | 73.50 [73.40, 73.70] | | 0.963 | 0.004 |
| FFMI(median，[IQR]) | 18.00 [16.50, 19.80] | | 18.00 [16.58, 19.50] | | 0.717 | 0.044 |
| FMI(median，[IQR]) | 9.90 [7.80, 12.50] | | 9.80 [7.70, 11.80] | | 0.481 | 0.057 |
| Neck(median，[IQR]) | 37.70 [35.40, 40.10] | | 37.20 [35.38, 39.60] | | 0.485 | 0.027 |
| Chest(median，[IQR]) | 99.30 [93.20, 105.20] | | 98.20 [93.18, 104.60] | | 0.451 | 0.044 |
| Abdomen(median，[IQR]) | 94.40 [86.60, 104.00] | | 93.55 [86.57, 103.50] | | 0.572 | 0.038 |
| Hip(median，[IQR]) | 101.20 [95.90, 107.20] | | 100.55 [95.80, 106.03] | | 0.389 | 0.053 |
| RightArm(median，[IQR]) | 33.60 [31.20, 36.10] | | 33.00 [31.10, 35.82] | | 0.275 | 0.053 |
| LeftArm(median，[IQR]) | 33.40 [31.00, 36.00] | | 32.75 [31.00, 35.62] | | 0.273 | 0.06 |
| RightThigh(median，[IQR]) | 55.00 [51.20, 59.00] | | 54.55 [50.77, 58.50] | | 0.384 | 0.057 |
| LeftThigh(median，[IQR]) | 54.50 [50.70, 58.50] | | 54.15 [50.60, 57.47] | | 0.358 | 0.058 |
| SMI(median，[IQR]) | 7.50 [6.80, 8.40] | | 7.50 [6.70, 8.30] | | 0.842 | 0.027 |

**Supplemental table2. Co relationship analysis for MAFLD**

|  | **Methods** | **R2/tau** | **P** |
| --- | --- | --- | --- |
| **Age** | spearman | -0.0674 | 0.0680 |
| **Gender** | kendall | 0.0780 | 0.0349 |
| **BMI** | spearman | 0.4711 | <2.2e-16 |
| **T2DM** | kendall | 0.0804 | 0.0297 |
| **Overweight** | kendall | 0.3327 | <2.2e-16 |
| **Obesity** | kendall | 0.4422 | <2.2e-16 |
| **Metabolic dysfunction** | kendall | 0.5088 | <2.2e-16 |
| **CRP** | spearman | 0.1953 | 0.0000 |
| **hB** | spearman | 0.2104 | 0.0000 |
| **ALT** | spearman | 0.3308 | <2.2e-16 |
| **TC** | spearman | 0.1310 | 0.0004 |
| **TG** | spearman | 0.3812 | <2.2e-16 |
| **HDL** | spearman | -0.2851 | 0.0000 |
| **WHR** | spearman | 0.1205 | 0.0011 |
| **VFA** | spearman | 0.3633 | < 2.2e-16 |
| **SMI** | spearman | 0.3355 | < 2.2e-16 |
